# Supplementary material for: Lignin metabolism has a central role in the resistance of cotton to the wilt fungus Verticillium dahliae as revealed by RNA-Seq-dependent transcriptional analysis and histochemistry
Source: PubMed Central journal article supplement — J Exp Bot. 2011 Aug 23;62(15):5607–21. doi: 10.1093/jxb/err245 (PMC3223054; doi:10.1093/jxb/err245), 2011-08-23
Supplement: supp_err245_00064840_file004.pdf [file supp_err245_00064840_file004.pdf]

Lignin plays obvious role in the cotton defence response to *Verticillium dahliae* through RNA-Seq dependent transcriptional analysis and histochemical test. *L Xu, L Zhu, L Tu, L Liu, D Yuan, L Jin, L Long, and X Zhang.*

#### SUPPLEMENTARY DATA

**Table S1 List of primers used for qPCR.**

| Gene ID                                 | Forward primer                | Reverse primer                   | Result (Failed) |
|-----------------------------------------|-------------------------------|----------------------------------|-----------------|
| CL5659Contig1                           | GAAATAGTGGCGTGGGA<br>GTTAGGAT | ACCATGAGAGACTGAGTT<br>GTGTGAGG   | F               |
| CL5961Contig1                           | CTCGGCTACAATCCCTC<br>GACCTCTC | GGACCAACCCGAGTTAAG<br>AGCAAGG    | F               |
| CL6579Contig1                           | GAGAACACCAACATTTC<br>GGGTCAAC | ATCTAACCTCTCTGTGTCC<br>TGTATGTCG |                 |
| CL6774Contig1                           | CGATGTGGGAGTCGTGC<br>ATGAAAGG | GGGAGTGCCTTCCAGAGC<br>AGGTATG    |                 |
| CL7826Contig1                           | ACTAGGCAAGACACTGT<br>TGGGGTTA | AGCGAATGTTTGCTACTAC<br>CCTGTC    |                 |
| CL10864Contig1                          | TCAAAGGGACTCAAAGC<br>CTCACAAC | GGGTTGATGGCAGCTTTCT<br>GAATAT    |                 |
| CL11195Contig1                          | ATTCGTGGATGCCTTGGT<br>GTCTCAT | AGCTAGTGCTACAAGCCC<br>AACATCTG   |                 |
| CL1Contig2953                           | AGTGGCTTCTAACCTCCT<br>TTTCTCG | TAATTCCATGAGAGACGG<br>GCAAATG    |                 |
| CL14866Contig1                          | TTGGAGATGAAGGTCTG<br>TGCGAGAT | TCAACGCAGTCAGATTAG<br>GGCAGTT    |                 |
| CL21478Contig1                          | GAGGCTTGGGTCAGTCA<br>AAGTGTAG | TAGTGCTTTTAGGCGAAAT<br>GTGGAG    |                 |
| gil164313245 gb ES<br>846884.1 ES846884 | CAAGAAATGGAGGATGA<br>AGAAGGTG | GGTGATGTCAGATACATAA<br>ACAGCCAAG |                 |
| gil164244139 gb ES<br>830058.1 ES830058 | CTCTGCCAATCTGCCATA<br>GAGGAGC | GTAAACGGTTCCCTTGCTT<br>GACTGG    |                 |
| CL500Contig5                            | CAAGCAGCACCGCTCGT<br>TCAACATC | GAAGTCCGTTACTACTTG<br>CCAACCTCC  |                 |
| CL957Contig7                            | AAGACTTGTGGCAAGGT<br>CGCCTAAC | GACCCAATACCCAAGTCC<br>ACCAGTT    |                 |
| CL1Contig585                            | AACCAGTGTTGGATTGG<br>AGCACAAG | AACCACTGCCTCGCAATAA<br>TCATCC    | F               |
| CL3903Contig1                           | ATTGGAAGTGGTGGCTC<br>TGGGAAAG | ACTATGTTGGAATGGCGAA<br>TGTTGC    |                 |
| CL5325Contig1                           | GTGATTTGGGCTTGTC<br>AAGGTCAG  | AACTCCCACATAACAATGC<br>CGAAAG    |                 |
| CL5588Contig1                           | ATGCAGGCTGATGACGA<br>TAGAGGAC | TTCAACCATCGGAATGAA<br>AGTTGTG    |                 |
| CL2337Contig1                           | GAGCTTTAACTCCCTGG<br>CATACTTG | GGAAGTCCACGAAGTTCA<br>TTGAAGT    |                 |

---

|                       |                                 |                                   |   |
|-----------------------|---------------------------------|-----------------------------------|---|
| <b>CL4605Contig1</b>  | TCCGTCTTGATCTTCACC<br>AGAACAG   | CCCTAAACGAGAAAGGGC<br>ACCTAAT     |   |
| <b>CL6449Contig1</b>  | GGGCAGCTCTATAAAGG<br>TTGGCTTG   | CCCAGAACGCTAACCCAA<br>TGACGAT     |   |
| <b>CL7785Contig1</b>  | AGCAACATAAGATTGTG<br>CGAGAACG   | CCTGGAAATTATCAGTCAT<br>CGCCTC     |   |
| <b>CL10161Contig1</b> | AGAAGCGACCGTCTATG<br>TTGGATGT   | CAATGACTTGCCTGAATAT<br>AAAGGAACC  |   |
| <b>CL11029Contig1</b> | AGAAGCGACCGTCTATG<br>TTGGATGT   | TGACGAAACATATACTTCA<br>TTGCTAGTGC |   |
| <b>CL15247Contig1</b> | GACGCTTATTTGGACATA<br>GGCTGACTT | CGTGCAAGTACAATAAGC<br>CCCTAGC     |   |
| <b>CL24027Contig1</b> | GCCTTCAATGGGAGAGG<br>TCCTATGG   | TGAATTGCCGACTCGTTTC<br>TGAGGTAC   |   |
| <b>CL988Contig2</b>   | CTCAGACTCAGACCAGC<br>ACTCCACC   | ACAAGAGGCTAGCTGCAA<br>GAACCAC     |   |
| <b>CL1840Contig4</b>  | TAGGGTCATCGTCCAGT<br>CCCAATAG   | TCCCAGTCAATAACTCCAA<br>AAGCAAC    |   |
| <b>CL3694Contig1</b>  | GCCACAAGCCGTATGCA<br>CCCGTTAT   | GCATGTCCCTTACCCAACA<br>TCCAGTCC   |   |
| <b>CL5860Contig2</b>  | ATGTCCCGTGTTCGTTGGT<br>ATGCTTG  | GGATGTTTGCATTTCATCC<br>ATAAAGGT   |   |
| <b>CL6016Contig1</b>  | GGAAATCTCCAATACAT<br>GCCACCAG   | TCAAACACTTCAGCGGTC<br>CACTCTT     |   |
| <b>CL7067Contig1</b>  | CCAGGTCCCTCTGTTTAC<br>GCCACTT   | TGAGTGTAACATTGGCAG<br>GGCTATTTCG  | F |
| <b>CL2460Contig2</b>  | TGATATTGGCAGTCAACC<br>GAAGGAC   | TGATACCACTTTCGTACCA<br>CGCAAC     | F |
| <b>CL4400Contig1</b>  | ACCTTGTTGGCTTGGATT<br>TGTATGG   | GCAGTAAGCTCCCTTGG<br>ATGGATC      |   |
| <b>CL4928Contig1</b>  | CCACGGGTTCCCTTCTCTA<br>AGTTTTC  | CCTGTATCATATCTCACAA<br>ATCCCATCAG |   |
| <b>CL5025Contig2</b>  | CACGGGAAAGCACGTTT<br>AGTATCAT   | AACCGTTCCGAATTGTTTA<br>ATGTGG     |   |
| <b>CL5079Contig1</b>  | GTCCAGGCAACAGGGA<br>ACTTCAGTG   | GTTTCAAGGGTCTTCACCT<br>CAGCATG    |   |
| <b>CL5905Contig1</b>  | CGATGCGGAGGTACAGA<br>CACTGAGC   | GCAATCTCGTACCTTGAT<br>CCCAATCG    |   |
| <b>CL6551Contig1</b>  | CGATGCGGAGGTACAGA<br>CACTGAGC   | CTCGTATGCAACCGATCCC<br>ACAAGC     |   |
| <b>CL6623Contig2</b>  | GGCTTGGCTTACCTTCAC<br>CATGATC   | TGAATCTTTCCTCCTCTG<br>GCTTGT      |   |
| <b>CL8229Contig1</b>  | GCTTTAGGTGCCTGGTG<br>ATTGTTAC   | GCGATTTCATACAAGTGTG<br>GAACAG     |   |
| <b>CL8764Contig1</b>  | ACAGTCACAAGCAACAG<br>GGATGGTT   | GAAGACTCGTTACTGGAG<br>GATTGGATTT  |   |

---

|                                                      |                                |                                   |   |
|------------------------------------------------------|--------------------------------|-----------------------------------|---|
| <b>CL9160Contig1</b>                                 | ACAGTCACAAGCAACAG<br>GGATGGTT  | TAAGACTCGTTACTGGAG<br>GATTGGATT   |   |
| <b>CL11186Contig1</b>                                | GAGGCACTATGGGGTAT<br>GAGGGAAT  | CTGATGAGGACAAGGATG<br>AAAATGG     | F |
| <b>CL13137Contig1</b>                                | CGAACCCAGAAGATAGA<br>CCCAGCAT  | TCTGTTTTTCAGCTTGGACT<br>ACTCAATCG |   |
| <b>CL13232Contig1</b>                                | AGATTGCTTAAACGGCT<br>TGGTTGTG  | TAAAGAGTGGGCAGAAAT<br>GGATGGT     |   |
| <b>CL14110Contig1</b>                                | GAAAATCGCCGACTTGG<br>GTTGTGCT  | TCCGGTGCCATGTAAAGA<br>GGCGTAC     |   |
| <b>CL14564Contig1</b>                                | CAAGGTACTCTAGCAGG<br>CCATCACA  | TGGGCAACATCTTCTCAGA<br>ATCAGT     |   |
| <b>CL15517Contig1</b>                                | TTCTCCCGTTGCCAGTCC<br>TACATTC  | ATAGCACAGCCATCGAATA<br>TCAAGC     |   |
| <b>CL22563Contig1</b>                                | GAAGTTGGTCTCGGACC<br>CTCTATCC  | TGTTTGCATCCCTGTCTCG<br>TTGAAT     | F |
| <b>gil109871381 gb D<br/>W500357.1 DW500<br/>357</b> | GGGTGATACCTTGCAGA<br>TTCTTCCT  | AACAGACTTTTGTCCCTGGT<br>GGTGAG    |   |
| <b>gil13247730 gb BF2<br/>71971.2 BF271971</b>       | TGCTGCTAACGGATCTA<br>GTCAAGTTG | CAAACGTGGATTCTTCAG<br>CTTAGTGT    |   |
| <b>CL19658Contig1</b>                                | AATCAAGTGCAGTTTC<br>CGGTAATG   | AACCACCAATTCAGATTCT<br>TAACCTTC   |   |
| <b>CL4331Contig2</b>                                 | ATGCCATATCCCGATCTC<br>AGCTTCT  | TATCGCCTCAATCATCGAC<br>ACCACT     |   |
| <b>CL6058Contig1</b>                                 | TGTAGAGCCTCATGGCG<br>AGGAATAC  | ATGCGCTCACTTTATCCGA<br>ATCAGT     | F |
| <b>CL6943Contig1</b>                                 | CCTGTTATTCCCAAAGA<br>CTGTCCAC  | AATTGCTCCAACACCTTCA<br>CTATCTG    |   |
| <b>CL9500Contig1</b>                                 | CTGTCGGAACCTCGTGTT<br>GGGATAGG | ATTGGGATGTCGAAGTCG<br>GCTAAGA     |   |
| <b>CL15603Contig1</b>                                | GCTGCTTGTGAAGGTCA<br>TGTTGAGG  | TGACTGCCATTGGTGTCTT<br>CCTGAT     |   |
| <b>CL23435Contig1</b>                                | GAGATGCTGGGTAGCCA<br>CTCCTGAC  | CCATTCAGTGTCTGCGG<br>TTTCCT       | F |
| <b>CL491Contig5</b>                                  | GGCTTTGACCACCAACT<br>CTGGACTC  | TAGATTGCACCTGCACGA<br>GACGAAC     |   |
| <b>CL2312Contig1</b>                                 | GAAAGAGAGGTTAGCAG<br>CGAGGAAT  | TTGCTTAGGATTGAGAGTG<br>CTATGCT    | F |
| <b>CL2312Contig2</b>                                 | CAAGAACTCAAGGCACT<br>GAAACTGG  | AAATGAGGCTTTGAAGGC<br>AATACTG     |   |
| <b>CL4258Contig1</b>                                 | GGGAGTGAGGAACAGTA<br>AAGGAGGA  | AGGAGAAGCAGGAAACTG<br>ATAAAGTGATT | F |
| <b>CL7303Contig1</b>                                 | GTCTAAGGTTGTGCCAG<br>TGGTGTCT  | GAAGACGCATGAAGGAAG<br>ATGTAAGAG   |   |
| <b>CL10177Contig1</b>                                | ATGAAAGAGCTGGAAGA              | CCTTGTTGTGGTGCAACTT               | F |

|                                                 |                                 |                                  |   |
|-------------------------------------------------|---------------------------------|----------------------------------|---|
|                                                 | TCCAATGG                        | GAGTGT                           |   |
| <b>CL13397Contig1</b>                           | GCGAAGCTGAACGGAG<br>AAAGCGTAG   | GGAAAAGGATGGCGTCAG<br>CCACTCT    | F |
| <b>CL17875Contig1</b>                           | TGGTCTTGACATGCTCG<br>AAACAACC   | TACGAAACATGTCGTCCTCA<br>TTGTTCG  |   |
| <b>CL963Contig2</b>                             | AAGGCTCTGGAAATGGG<br>TGCTGTAG   | CAGCCTCCTGCTCCTTATT<br>CAGGTG    |   |
| <b>CL1335Contig1</b>                            | TCAAAGACATAAAGCGG<br>TACACTGGAG | GCCAGTAGAGCCAGAGGA<br>TTGTCAT    |   |
| <b>CL1763Contig2</b>                            | TCAGTGAAATGCTGCTG<br>AGGTGTTA   | AAATTCCTATGGGATGGAG<br>GTTGTC    |   |
| <b>CL1796Contig1</b>                            | CATAAAATGGAGCAGAT<br>TCAGTTCG   | CCTTTGTCTGGACTCCTCTA<br>TAATGC   | F |
| <b>CL3224Contig1</b>                            | AGAGCGATTTCAGATTCC<br>TCGTCCCTC | CTCAGCAGGCAACTGATT<br>AAGATCAAAT | F |
| <b>CL3667Contig2</b>                            | TAAGCGACGAGCAGAGG<br>CATTACAG   | GCTTCAATGGCGGTATCAA<br>AGGTTC    |   |
| <b>CL6560Contig1</b>                            | TTCCGATGAGGAAAGGA<br>AGAGGAGC   | CTTTGACCGATCCGTTGGC<br>TTCTAC    |   |
| <b>CL10178Contig1</b>                           | GAGACCGGCTCAACTAC<br>CGCCACAG   | CGAATCGCAGTCGCTGTG<br>ACAATCC    | F |
| <b>CL10243Contig1</b>                           | GCACCTCCTTGAGACT<br>TCCCTTCG    | GATTCGGCAATTCGGGTCA<br>GATACG    | F |
| <b>CL14369Contig1</b>                           | CGAGCCCAAAGATGAAT<br>CAGCAGAG   | CCTTTGCCTAACTCCACGG<br>TAATGTCT  |   |
| <b>CL15501Contig1</b>                           | CGACAACACCTTCTCGG<br>TGACTTTG   | GATTTTCAGGGAGTTGATGG<br>CTTTGG   |   |
| <b>gil193218961 gb EY<br/>197233.1 EY197233</b> | GCAGCGTCCGGTTTACT<br>TCTTCGAT   | CAAACACTCTACGCCGCA<br>CTCCTCC    | F |
| <b>CL1Contig3306</b>                            | TTGGGCACCGTCCGATA<br>ACTCTAAG   | ACGCCTCTGTAATGCTTCC<br>CTTTGG    | F |
| <b>CL322Contig3</b>                             | CTCGCTTACGACGGAGC<br>AGCTAGGT   | AACGGTGATGGTGATGAG<br>GTGAAGC    |   |
| <b>CL5067Contig1</b>                            | CCCTCAACATAGTCGGT<br>CGTAAGTT   | CACGGACCAAGTCAGAAA<br>CTACCAT    |   |
| <b>CL6871Contig2</b>                            | GCTCTTCGTCGTCAAAG<br>CAATGGAT   | CAGCTTCCAATCGACCACA<br>TTTATGC   |   |
| <b>CL10876Contig1</b>                           | TCGGACCTGGTGGTAAT<br>GACAACCT   | CAATGATGTTGGGCTGTTG<br>CTGTTC    |   |
| <b>CL16071Contig1</b>                           | CGTTCAACATTCATCCTC<br>CACATTT   | ATGATGCTGCACCATTTGT<br>AAACAC    |   |
| <b>CL20845Contig1</b>                           | AAGGAGGAAGAGCAGC<br>GGATTTTCG   | TCTTCGGTAGCAAAAAGTG<br>CCCAGGT   |   |
| <b>CL514Contig1</b>                             | AGTCCGAGAAGGTAAGA<br>TCCGACAA   | CCTGAGGAAAAGACAGTG<br>AAGGTGG    |   |
| <b>CL514Contig4</b>                             | TAGGGGTGTGAGACAGA               | GTGCCAAGCCAAAGTCGT               |   |

|                       |                                  |                                  |   |
|-----------------------|----------------------------------|----------------------------------|---|
|                       | GGCATTGG                         | GTTCG                            |   |
| <b>CL824Contig1</b>   | AAGTGAAAGCAAGTCCG<br>TTGAGGTT    | CAAGCAAAGACCCTAAGC<br>CTAAGGT    |   |
| <b>CL1335Contig1</b>  | TCAAAGACATAAAGCGG<br>TACTGAG     | GCCAGTAGAGCCAGAGGA<br>TTGTCAT    | F |
| <b>CL1539Contig2</b>  | TGATAAAGGTGAAGATA<br>CAGCCGAACC  | CGAGGAGAATACAGCGAA<br>AGTGGAG    |   |
| <b>CL1763Contig2</b>  | TCAGTGAAATGCTGCTG<br>AGGTGTTA    | AAATTCCTATGGGATGGAG<br>GTTGTC    | F |
| <b>CL1796Contig1</b>  | AATCTCGTTGCCGCATAA<br>AATGGAG    | GCCTTTGTTCGGACTCCTCT<br>ATAATGC  |   |
| <b>CL2539Contig1</b>  | GTGGGATTGTGGAGCTT<br>TTCAAATG    | AGTTGAAGAAATCATCTTC<br>GTCAAGGC  |   |
| <b>CL2870Contig1</b>  | ATCAAGTCCAGCAAGCG<br>GAGAGAAG    | CCTCATCCTTATCCCTCTG<br>AATGGTTT  |   |
| <b>CL3224Contig1</b>  | TGTTTTTCGTTGATGTCT<br>TTGCTTC    | TCTCAGCAGGCAACTGATT<br>AAGATC    |   |
| <b>CL3667Contig2</b>  | GCAGAGGCATTACAGGG<br>GTGTTAGG    | CTTCAATGGCGGTATCAAA<br>GGTTCC    | F |
| <b>CL5722Contig1</b>  | CGTGTACGGCTTTGGTTA<br>GGCACCTATG | GCAGCGAAGAACGGAAGT<br>CGGTGAG    |   |
| <b>CL1Contig2018</b>  | AAGAACAAATCTGGAGC<br>CTGGAATC    | CGCCGTTGCTTATACTGAG<br>TTACGA    |   |
| <b>CL6085Contig1</b>  | GGTTGGAACGATCTTGG<br>TGGTTTCG    | CGTGTGTTCTTCGGGTTT<br>CACTGG     |   |
| <b>CL6525Contig1</b>  | CGATCTGGTGGTTTCGC<br>AACTGAC     | CGTGTGTTCTTCGGGTTT<br>CACTGG     |   |
| <b>CL6560Contig1</b>  | TAACTCCGATTATTTCC<br>GATGAGG     | ACCTTAGTTCTTTGACCGA<br>TCCGTT    | F |
| <b>CL8001Contig2</b>  | GCAGGAGGTTGCTTCCA<br>AGTCTACG    | GTTCGGTTCTTGGGGAGTC<br>TGATTT    |   |
| <b>CL8846Contig2</b>  | TGCTAATCTTTGTTCGCA<br>ATTTGTC    | CCCTGTATCTCCTCCTTGG<br>TTCTTC    |   |
| <b>CL10178Contig1</b> | CGGCTCAACTACCGCCA<br>CAGAAGTC    | CGAATCGCAGTCGCTGTG<br>ACAATCC    |   |
| <b>CL10243Contig1</b> | GCACCTCCTTGGAGACT<br>TCCCTTCG    | GATTCGGCAATTCGGGTCA<br>GATACG    |   |
| <b>CL10357Contig1</b> | CCTACCTCCATCCCGAC<br>GCCAAAC     | CGCTCCTGCTTCGTATTCC<br>CCGATAACT |   |
| <b>CL10885Contig1</b> | TGCCGTTTCCTTTCTCAT<br>CTTGAT     | TTGAACCTTTGACTATTG<br>CACGAC     |   |
| <b>CL11822Contig1</b> | AAAACCTGTTGTTGAGTG<br>CTCCTTGC   | AGAACCCAGCTCCTCATT<br>CTTACA     |   |
| <b>CL11847Contig1</b> | ATCAAAGGAAATACAAG<br>GGAGTGCG    | TTGAATACGAGCCTAACCA<br>AAGACG    |   |
| <b>CL14369Contig1</b> | CGAGCCCAAAGATGAAT                | CCTTTGCCTAACTCCACGG              | F |

|                                            |                    |                     |   |
|--------------------------------------------|--------------------|---------------------|---|
|                                            | CAGCAGAG           | TAATGTCT            |   |
| <b>CL15501Contig1</b>                      | CGAGCCCAAAGATGAAT  | CCTTTGCCTAACTCCACGG | F |
|                                            | CAGCAGAG           | TAATGTCT            |   |
| <b>CL19861Contig1</b>                      | GAAATGGGTGGCTGAAA  | GAAATGGGTGGCTGAAAT  |   |
|                                            | TAAGGGAA           | AAGGGAA             |   |
| <b>gil193218961 gb EY197233.1 EY197233</b> | TTCTCCGCCGCCACTTG  | CAAACACTCTACGCCGCA  |   |
|                                            | ACCTTACT           | CTCCTCC             |   |
| <b>gil59800344 gb AY781119.1 </b>          | CACCACCTTATCCTATGG | ATGATTCCAGGCTCCAGAT |   |
|                                            | GTCTTGG            | TTGTTC              |   |
| <b>CL1Contig3306</b>                       | TTGGGCACCGTCCGATA  | ACGCCTCTGTAATGCTTCC |   |
|                                            | ACTCTAAG           | CTTTGG              |   |
| <b>CL1Contig3370</b>                       | GATTCCAAGGCTCCAGA  | AGCTCTTACTCTGCTTCT  |   |
|                                            | TTTGTCT            | CCTGCT              |   |
| <b>CL29Contig2</b>                         | CATTTGCTTATGTGGACA | TCCCTGGTCTGAGCCGAA  |   |
|                                            | CTGTTCCCTG         | ATACAAG             |   |
| <b>CL29Contig4</b>                         | AATGTTATGCCTGCCGAA | CAATAGTGGCGTCCCAGTT |   |
|                                            | GACAACTC           | TCCTTC              |   |
| <b>CL29Contig8</b>                         | TCCGACTATGGCTGGGG  | CAAAGCCAACAGCTCGTC  |   |
|                                            | AGAACAGG           | CGACAAG             |   |
| <b>CL29Contig9</b>                         | AGGTGAACTTCCCTGAT  | CTCTTCAACGAAACCCAC  |   |
|                                            | GAGATGCC           | GGTATCA             |   |
| <b>CL322Contig3</b>                        | TCGCTTACGACGGAGCA  | AAACGGTGATGGTGATGA  | F |
|                                            | GCTAGGTC           | GGTGAAGC            |   |
| <b>CL1714Contig2</b>                       | GGGTGTACGCAGAAAAT  | CCTCTGACAATGAGCAGT  |   |
|                                            | GGTAGTCA           | CCTCTTG             |   |
| <b>CL1Contig339</b>                        | AAATCCTCAGGGTTCAG  | TCAGATCATCGTCATCGGC |   |
|                                            | CTCAAAGC           | AAGTAA              |   |
| <b>CL13083Contig1</b>                      | CTGTTGCTCTCTCATG   | TCATGGTTCATTACAGCAA |   |
|                                            | CGGCTAT            | GGAAATC             |   |
| <b>CL5641Contig1</b>                       | AAGGTGGGACGGATAAA  | AAAAGGAGGATTGAGGGC  |   |
|                                            | GGGATAGC           | GAGAGAT             |   |
| <b>CL6228Contig1</b>                       | CAAGGACGGTCAATGGT  | CCTTGTTTCTCAGCCATTA |   |
|                                            | TTAGAATC           | CACGAT              |   |
| <b>CL6228Contig2</b>                       | AAAGACGGTCAATGGT   | TCCCTTGTTTCTCAGCCA  |   |
|                                            | TAGAATCC           | TTACAC              |   |
| <b>CL14700Contig1</b>                      | GAAGTGGGGATTCTTTG  | GATTCAGGGAGATGGCGT  |   |
|                                            | AGCTGCTG           | AAGAAGA             |   |
| <b>CL26Contig1</b>                         | AGGAGTTGTTGGATTTG  | GGGGTCGGACATGGTGGA  |   |
|                                            | TTTTGTGAGAAT       | TAGTTG              |   |
| <b>CL26Contig11</b>                        | CGTAAACAGCCTCACTC  | TTCAACACCTCAAAGAAG  |   |
|                                            | TGAGAGTTCTT        | CCCCAAT             |   |
| <b>CL26Contig14</b>                        | ACAGGAGTGTGGAGCAC  | CATTCCTTCTTCTTCTGCT |   |
|                                            | CGTGTGAT           | TTCATTCT            |   |
| <b>gil164255880 gb ES843034.1 ES843034</b> | GGCTTTAATGAAATGTTT | GGGAACATTACTGGGACC  | F |
|                                            | GGGCTGTCCG         | CCAACCG             |   |
| <b>CL9140Contig1</b>                       | CCTGGTTGGTTTAGGGTT | AAGGCTGCTTCGTCTGCAT |   |

|                       |                                  |                                   |   |
|-----------------------|----------------------------------|-----------------------------------|---|
|                       | TGTTTTG                          | AACTTG                            |   |
| <b>CL9140Contig2</b>  | CGGTTTGGTTTGCTAATA<br>TGGAGGA    | AAAGGGAACGGGATAAGC<br>TGAGTTT     |   |
| <b>CL9160Contig1</b>  | ACAGTCACAAGCAACAG<br>GGATGGTT    | GTAAGACTCGTTACTGGA<br>GGATTGGATTT |   |
| <b>CL5Contig1</b>     | GATGCTGATGGAAATGG<br>GACCATTG    | CATGGCGAAGCTCAGCAG<br>CAGATAT     |   |
| <b>CL5Contig3</b>     | AGGAGTTGGGAACTGTG<br>ATGCGATC    | CTTGTCAAACACCCCTGAAT<br>GCCTCTT   |   |
| <b>CL5Contig9</b>     | TCATCAGTTTCCTTCCGC<br>TACCTTC    | CATCACAGTTCCCAACTCC<br>TTGGTAGT   |   |
| <b>CL5Contig15</b>    | TGTTTCAGTAGTCCGGGT<br>TGTCAGTG   | CGATTCTTGGAATTGTTC<br>GAGGTT      |   |
| <b>CL19667Contig1</b> | CATGGGAGAGTTGGCAG<br>CAGTGATC    | TGAAATCGATGGTCGTCCC<br>ATTCC      |   |
| <b>CL9646Contig1</b>  | TCATCTTCAGGTTTCCAG<br>GATTTCT    | TCTTCAAGCTGTCGAAAGT<br>AATGACC    |   |
| <b>CL5513Contig1</b>  | GCAGGAAACTGATGCAG<br>AAGAGGAG    | CTTCATAGTTGACTTGACC<br>ATCACCGT   |   |
| <b>CL9160Contig1</b>  | ACAGTCACAAGCAACAG<br>GGATGGTT    | GTAAGACTCGTTACTGGA<br>GGATTGGATTT | F |
| <b>CL3197Contig2</b>  | ATCATCTATTTGCTGCCT<br>TCTCCTACTT | TAATCAATGCGTCCGTCAT<br>TATCCT     | F |
| <b>CL3711Contig1</b>  | TTCTTAATGCTATGGGAT<br>TGCTTGC    | ATTGAAATTACTCGATTGC<br>CCTCCT     | F |
| <b>CL4384Contig2</b>  | AGGCTGGTACGGATTGG<br>AGAAAAGC    | TGTTGGGTCATCTGGGCTC<br>ATTGTT     |   |
| <b>CL10447Contig1</b> | GCGTGGGCTGTAGGAGT<br>TACCTTGT    | TGAGTTTATGTCGTTCCGGC<br>AGGATT    |   |
| <b>CL11186Contig1</b> | CTTTTGGAGGCACTATG<br>GGGTATGA    | TCTGATGAGGACAAGGAT<br>GAAAATGG    | F |
| <b>CL11333Contig2</b> | CTGCCATCATGCACGATG<br>TAGACAC    | TATAGGATTATCGGGCGAC<br>AGCAAT     |   |
| <b>CL22563Contig1</b> | GAACTTGGTCTCGGACC<br>CTCTATCC    | GTTTGCATCCCTGTCTCGT<br>TGAATC     |   |
| <b>CL1Contig3979</b>  | GTTTGCGAAGATACGGC<br>TCTACCTT    | TGGTCCCACTATTATCGAC<br>ATCAGC     |   |
| <b>CL5311Contig1</b>  | GAAACGACACCGCATGA<br>TAAAGCAC    | AAGGGAGAAGGGCTCTAA<br>GCCTGTT     |   |
| <b>CL7787Contig1</b>  | ACAAGCAGCAGCTTCCA<br>TACAACAG    | ACAGGCACTAAACATAGC<br>CCACGAC     |   |
| <b>CL18916Contig1</b> | GACCCAGCAGAAGGAC<br>CTAAACAAGAT  | GTCCAGAAATCCACAGGC<br>GACTCAT     |   |
| <b>CL2138Contig2</b>  | GTGAAACAGGGGAGTG<br>GGACTION     | CGGCTTTGGTACTGGTAT<br>TGGTTA      |   |
| <b>CL2410Contig1</b>  | ATGCCATTACCTATATCA               | TTTGCCCATTTTATCATC                |   |

|                                                 |                    |                     |   |
|-------------------------------------------------|--------------------|---------------------|---|
|                                                 | CCGACCT            | TCCTT               |   |
| <b>CL4555Contig1</b>                            | GGCATAGCCAATACCAC  | TGCTCTGTAAATCATCCTC |   |
|                                                 | TTCTCAAC           | CCAAAT              |   |
| <b>gil11203333 gb BF2<br/>72338.1 BF272338</b>  | TCTGCTCGTGCTGCTTAC | GCTCCTCTTCATGGCAATC |   |
|                                                 | TCACCGT            | CATCCT              |   |
| <b>CL2771Contig1</b>                            | TTTACCTCGTGCGATTCC | TGATGTATTGTATCTTGAG |   |
|                                                 | TGCCACT            | GGCGAACGG           |   |
| <b>CL6159Contig2</b>                            | TCACAACAAAACAATCA  | AAGGTTATGTGAGGACAT  |   |
|                                                 | AACGAAACAG         | GCTGTGG             |   |
| <b>CL1497Contig2</b>                            | CGGCAACTCCCATTCTC  | AATCCGGCGATGTAACATT |   |
|                                                 | CTATCTCC           | CGTGTC              |   |
| <b>CL2985Contig2</b>                            | TAAAACCGCAAGATTTCG | AACCACTGAAGGAAATCC  |   |
|                                                 | GCTGTTAG           | CGACAGT             |   |
| <b>CL3429Contig3</b>                            | ATCAAGTTCACAACCCA  | CGTCGTACCCGCTTATGTC |   |
|                                                 | ACGCTTCG           | TTCCAC              |   |
| <b>CL3611Contig2</b>                            | TGGTAGTTGAGGCAGAT  | TGCAGTAAATACCATTGGC |   |
|                                                 | TCTGTATGTTG        | ATGTGAT             |   |
| <b>CL2629Contig2</b>                            | GAGTCGTGGGGAAGTAC  | CATGATCGGAGGAAGGAG  |   |
|                                                 | AGTGTGTG           | TTGTAGC             |   |
| <b>CL1672Contig2</b>                            | TCCTCCGAGCAGCGTGT  | GAATCACTTTGTGCCCTG  |   |
|                                                 | CAACCTAC           | AAGAATGG            |   |
| <b>CL5620Contig1</b>                            | TGGATTCAATCCAAGTC  | ATAAATTGCTGTCACCGTC |   |
|                                                 | CCTGAGCT           | ACCCAC              |   |
| <b>CL6391Contig1</b>                            | CATTGAGGAAGGTTGTA  | CAACTGTGCAAAGCCTTA  |   |
|                                                 | CCCGACAC           | ACCAGAC             |   |
| <b>CL8210Contig1</b>                            | AGGCCAAGCCACCATAT  | TTCCCTCCAACCTCCATA  |   |
|                                                 | TTGTGAAG           | CTCTTCTTC           |   |
| <b>CL1784Contig2</b>                            | TGCTGGTAGTCTCCTTCC | TGTTAGGCAACTCAGGGA  |   |
|                                                 | ATCTGTT            | CACTGTT             |   |
| <b>CL6198Contig1</b>                            | CTCAACTCTATCATCAAA | GGTTTCACTTGACCCTCGG |   |
|                                                 | CGAAGCATTAG        | TATCCT              |   |
| <b>gil164326605 gb ES<br/>818723.1 ES818723</b> | TCGCTCATGGCGTGTTTG | TGCTGCGGTAAGACCCGT  |   |
|                                                 | AGTGTTG            | AGTTGCT             |   |
| <b>CL1875Contig2</b>                            | TTGAGGACAACGATGTA  | TCCGACCAACTCCGATACC |   |
|                                                 | CGCTAAGC           | CAC                 |   |
| <b>CL243Contig3</b>                             | GTTCGGGAGATTTGGATT | ATAAAGGCGGTGAATCGG  |   |
|                                                 | ACGTTGG            | AAGGTG              |   |
| <b>CL11215Contig1</b>                           | TTCTAGCGATGGTCTTGG | TCAGGTTGCTGGTTCTGTG |   |
|                                                 | GTGGAGC            | GGTGCT              |   |
| <b>CL2312Contig1</b>                            | GAAAGAGAGGTTAGCAG  | TTTCTCCTTGCAATTAACA |   |
|                                                 | CGAGGAAT           | CCGTCT              |   |
| <b>CL4258Contig1</b>                            | GGGAGTGAGGAACAGTA  | GATTGAATCTCATGCAGGA |   |
|                                                 | AAGGAGGA           | CGAAAC              |   |
| <b>CL10177Contig1</b>                           | ATGAAAGAGCTGGAAGA  | CCTTGTTGTGGTGCAACTT | F |
|                                                 | TCCAATGG           | GAGTGT              |   |
| <b>CL13397Contig1</b>                           | CGAAGCTGAACGGAGA   | TGGCTCGGATGAAGTGGT  | F |



|                                            |                                 |                                   |   |
|--------------------------------------------|---------------------------------|-----------------------------------|---|
|                                            | AAGCGTAGG                       | CAAAGAAG                          |   |
| <b>gil109877738 gb DW506711.1 DW506711</b> | CCCAAACCTCCGAACTGC<br>CATCAAGG  | CTACCTCGGCCTCGACTTC<br>GTCCAT     |   |
| <b>gil31406542 gb CD485577.1 CD485577</b>  | CCATTACCAGGCTCAAA<br>GCATCCAC   | TGTCCTCGTTAGTGCCAGC<br>ATTCC      |   |
| <b>CL2572Contig1</b>                       | ACTTCCCACCATTCTATC<br>CATTTTCA  | CTGCTGTTGGCTTCACCAC<br>TTCA       |   |
| <b>CL872Contig2</b>                        | AGGGACTGGGTCTCGTT<br>CTTCTGAT   | CCACTTGAGTCGGTGTTCG<br>GGTAG      |   |
| <b>CL8924Contig1</b>                       | AAACAGGCGAAACAGC<br>TTAAATGCG   | TGCGTAGGTAGTGTTGGT<br>GGAGGAG     |   |
| <b>gil164284962 gb ES796995.1 ES796995</b> | CGAGGCTGATAGTAGCA<br>GAGTTGTGG  | ATCTTTGATACGTTAGGAA<br>CTACGGCAC  |   |
| <b>CL1Contig3361</b>                       | ACGGAACCTCATCACGCA<br>AAGCTCAG  | TCGACTCCAGCATGTGGGT<br>CACTAAT    |   |
| <b>CL2920Contig2</b>                       | TCTTCTGGGGGATGCTAT<br>TTCGTAT   | TAGTAATTTGTGGGACGAG<br>GTGAGG     |   |
| <b>CL4565Contig2</b>                       | TGATGAGGTTGCCCGTA<br>AGATTGAG   | GAACAGGAAAGGTGCGGA<br>AAGACAC     |   |
| <b>CL8126Contig1</b>                       | GCCGTCTTGCGTACATTA<br>TTTATTCC  | AATGGGTCTCTAAGAAGC<br>AACGAATG    |   |
| <b>CL9160Contig1</b>                       | ATTGGTGGTTATCAGTCG<br>TTGGAGC   | AACCGATTTGTGCTAACTG<br>GCAGAG     | F |
| <b>CL2460Contig2</b>                       | CGGATAAACTGTCTTGCT<br>TGGTCTC   | TAGATGCAGGCTTGCAAC<br>CTCATA      |   |
| <b>CL10138Contig1</b>                      | AAGCTCCTTGAAATCCA<br>ATCTGACG   | TCTACAATTCCAGCCAAGA<br>ATAGAGAGTT |   |
| <b>CL8872Contig1</b>                       | AACCGTACATCTACCGG<br>CTCCCTCT   | TCACACAATGCTCGGATTC<br>CTCAAC     |   |
| <b>CL10924Contig2</b>                      | ATAAACCGAGCGAACAA<br>TCGAATGG   | GCTCATTTGACCCACTTTC<br>AGGACC     |   |
| <b>CL14352Contig1</b>                      | CAGAAGAGACAGAGAG<br>AACCGAGATTC | TGGTGGTGCAACGATAATA<br>ACTCCT     |   |
| <b>CL15725Contig1</b>                      | CATTAGGGTTTATGGAGT<br>TGTTGGG   | AGGAAGAGTAAGGTGTAG<br>CAGGCAG     |   |
| <b>CL20464Contig1</b>                      | TTACTCGGTGATATTGTG<br>CCTCCTG   | GGCTGCCCTTATGTTTATA<br>CCCATC     |   |
| <b>CL23838Contig1</b>                      | TCTGCTTCTTTGCCTTAT<br>GGTGTTG   | AGCTTTGGCCCGACTGTAT<br>TTTAAC     |   |
| <b>CL11304Contig1</b>                      | AGAGGATCAATGAACGG<br>CATTATCA   | CGGGGTGTTCTTATTATCTT<br>CTCGG     |   |
| <b>CL10036Contig1</b>                      | AATATGGGTTACCGTGA<br>AGGGATGG   | TTAGGAGGAAGGACTTTA<br>ACTGAGATTGG |   |
| <b>CL13863Contig1</b>                      | AAAATCAGAGCGTCAAG<br>GCATAAACT  | AACAGGCACTTTCTATCTC<br>ATTGAACC   |   |

|                       |                                  |                                   |   |
|-----------------------|----------------------------------|-----------------------------------|---|
| <b>CL21776Contig1</b> | CAAAGATTAGTGGCATT<br>GGCTGAGG    | GTGGGGTGATTTTGGACTA<br>AATCCTGT   |   |
| <b>CL3321Contig1</b>  | TCTACAGAGGAACCGTT<br>TGGGACAC    | TCGTTTCATCCACCATA<br>ATGCTCT      |   |
| <b>CL667Contig1</b>   | GCTCATAACAATACCAAG<br>CTGACACGT  | CAGGAAACTGAGAAGTGC<br>GAAATAAAC   |   |
| <b>CL8429Contig1</b>  | AGACCTTCTTCAAATGC<br>CCTACTGG    | TCACGCCATCTGTAAACTT<br>ACGCTT     |   |
| <b>CL10780Contig1</b> | CCAACAACCCTTCAGCC<br>GCAACAGT    | GCCGGGCGTAAACTCCGA<br>CAGACAT     |   |
| <b>CL14766Contig1</b> | AACTGCAAGACACCGCA<br>ATCTTCCT    | GTTCACGTTTCCAATACGC<br>TCACCC     |   |
| <b>CL1Contig3332</b>  | TGTTTCTAGTCACGGTGT<br>CTCCATTT   | GAGTCTCCCTCTACCATAA<br>CAACTGCT   | F |
| <b>CL2517Contig1</b>  | TCAACCTACCGACCCGA<br>ACAACGAC    | CCCATAAAGAACAAAGCG<br>GAAATCAAGAC |   |
| <b>CL306Contig2</b>   | GCCAATGCCGGAAGAGT<br>ACCATAAC    | CCACTCTAAGCCACTTCAG<br>CCTCGT     |   |
| <b>CL5553Contig2</b>  | CTGTGGGTAAATGGGAT<br>GAGATACG    | GCTCAGTAAGGCAAATAA<br>CGCAGTC     |   |
| <b>CL5919Contig2</b>  | TGCTGCATCCTTTACTAG<br>GTCTCAAT   | CTAATCTGTTCCCTCGCACT<br>TCTTTGA   |   |
| <b>CL7354Contig2</b>  | TTCCGCTCATCTTTTCTA<br>CTCATTGCTC | TTGGTTTGA CTCTATGTGC<br>CGCCTT    |   |
| <b>CL9420Contig1</b>  | GTTAGGACTCGGAGGTC<br>AAACAGTAGTT | AACAGGAGCATTCAAATC<br>GTTAGGTAT   | F |
| <b>CL224Contig8</b>   | TGCTGTCGGATTCTGAG<br>AACTATGC    | TGCAGCTGAAACCGATAA<br>CTTGATCT    |   |
| <b>CL2240Contig3</b>  | GAGGGAGTCTTCTCCTG<br>GTTTTGAT    | TCATTGACATTCCTTCCCT<br>CATGTC     |   |
| <b>CL1347Contig1</b>  | TTTTTGTGGGATCCATAG<br>GTACCCT    | AGAGGATTAGCTTTGGCGA<br>TTTGTT     |   |
| <b>CL6697Contig1</b>  | AGCATCGTTTCGAGGTG<br>GAGATTAC    | AGTCCTTTTCGCTGCATTT<br>GTTAGG     | F |
| <b>CL745Contig2</b>   | GTCGTCCGATAGCCTGA<br>CCGATAAG    | AAACTGATATGGACACCG<br>AGACTCCG    | F |
| <b>CL23796Contig1</b> | GTATGGGTGTTGATTGTG<br>GGATTTG    | GCCTTATGAGGGCATTGAT<br>AGCATT     |   |
| <b>CL2655Contig2</b>  | GTGTGGGAGAAAGTGAT<br>AGGGATGC    | GAATGGGAAGATGATGGC<br>TAAGAACC    |   |
| <b>CL10685Contig1</b> | CACCCTTATATGGGCGTG<br>ATACTGT    | GGAAACCTATTAGAATCCG<br>CAAAGC     |   |
| <b>CL1354Contig1</b>  | CATCAGGGCAGGCTAAG<br>GTAATAGG    | ACAAGGAAAGGACCCAGG<br>AAGAAGT     |   |
| <b>CL4345Contig2</b>  | GGCTCTGCGCTTGAAAG<br>GACCTGTT    | TCATTGCCACATTAGCCA<br>TCTCTTCTT   |   |

|                                         |                                |                                   |   |
|-----------------------------------------|--------------------------------|-----------------------------------|---|
| gil109835989                            | CATCAACATCGGAAATA<br>CTGAACCC  | TTCACTTGGAATATGGCA<br>ATACACC     |   |
| CL6569Contig1                           | AGTCAAGAACAAGAGA<br>GAAACGATGG | GCCTCATAATCCAAACCC<br>TAACTT      |   |
| CL1Contig486                            | GCTCCGTGTTCTCCTTCT<br>GGGTCTA  | ATCCAAAGCACTCATCACA<br>ATCCAATC   |   |
| CL76Contig5                             | TCACAACCACCCACCC<br>TTGTCCAC   | CTGGATTGAACACGCTCCT<br>CCACACGT   |   |
| CL217Contig3                            | TGAGAGTAGAAGGGACG<br>GGAGTTTG  | TTAATCTTCCCCTCGCCG<br>CTAAAT      |   |
| CL15247Contig1                          | GGTCATCGAATCTCCTTT<br>GGCTCTA  | CAGCCTATGTCCAAATAAG<br>CGTCAG     | F |
| CL1Contig585                            | GTGTTGGATTGGAGCAC<br>AAGGAAGA  | AACCACTGCCTCGCAATAA<br>TCATCC     | F |
| CL2857Contig3                           | TGGTCCATCAGTGCTCC<br>TGTCACC   | GGAACGATCTGACGACCA<br>GGGCTAG     |   |
| CL8458Contig1                           | GATGACCTGTCAAAGCC<br>CCAAGACC  | TCAGCAGTGAATTTATGCT<br>CCTCAAACC  |   |
| CL7067Contig1                           | TAGGTTGGGTTATACCAC<br>CAGGTCC  | GTGTAACATTGGCAGGGCT<br>ATTCGT     |   |
| CL19000Contig1                          | ATCGCCACTGCAATTCC<br>GACTCTAG  | CATGCTTGAAGGAGTTCTT<br>CCGTGC     |   |
| CL8228Contig1                           | TTCCCTCATTGCTCAGAA<br>GTGCTCG  | AAACTCGGCCTTGTCCCTC<br>TTAAATGC   |   |
| CL9665Contig1                           | AGTTCTTCACATAGCTGC<br>AATGCGA  | TTATTCGTTTCCTTCCCTTG<br>CTCTG     |   |
| CL10612Contig1                          | TATGAAGGCTTTGGACTT<br>GGAGATG  | TTTCTCCCCAATCCATAA<br>CTATCG      |   |
| CL12916Contig1                          | CCTCACAACCAAACAAG<br>AACCGAAT  | CTCACACATTTCTGGCTGA<br>ATCGTT     |   |
| CL23499Contig1                          | GATACTTGAAATGATGGC<br>TGATGGGT | GTTGAACATTAGGGCATGG<br>TGGGTA     |   |
| gil164327463 gb ES<br>826231.1 ES826231 | CGTTTCTCCGTTGTATGA<br>AGGCTTT  | CCATAACTATCAATTAGCA<br>TTAACCAGAT | F |
| gil45774313 gb AY5<br>60549.1 AY560549  | TCTCCTTCTTCTTTTGC<br>TTTGTGG   | ACCTTCAACTGGAATGGC<br>GAATGCT     |   |
| gil21092682 gb BQ4<br>04995.1 BQ404995  | CTTGAATGGAACGAGCA<br>GTAATGTG  | TGTCATCACCTGTAAGGAA<br>TCACCA     |   |
| gil21101348 gb BQ4<br>13661.1 BQ413661  | AAAAGAGTATTGGTCTG<br>GTGGGACTG | GAATGGAACGAGCCAGTA<br>ATGTGAT     |   |
| CL28Contig11                            | CGGAGTCAATGTGCTTT<br>GCTGGGTC  | TTTCTCTAGCAGCCTTCGC<br>CATTC      |   |
| CL28Contig12                            | TTCCAGTCATTCAATTCC<br>GTTTCATC | CAATGGGACCTCAACCAG<br>TTCTTTC     |   |
| CL138Contig2                            | AATAAAGGCTATCCCAA<br>CTCACCAT  | TAATTTGTCTTTGCCATCA<br>CTACCTCTT  |   |

|                                                      |                                 |                                  |   |
|------------------------------------------------------|---------------------------------|----------------------------------|---|
| <b>CL4890Contig2</b>                                 | TCGTTACTGCTTTCGTAC<br>TCAACCC   | TGCCTTTGGATAAAGACAA<br>TTCCTG    |   |
| <b>CL702Contig2</b>                                  | CCAGTGATGGTCTATGG<br>GATGTAATG  | TCTGGAGTCAGTGTAGCA<br>CCGTTCT    |   |
| <b>CL1264Contig2</b>                                 | TGGAGAGCATGGGATTA<br>GGGTGAAC   | GACGCAAGAAACACCACA<br>GCATCAG    | F |
| <b>CL1467Contig2</b>                                 | GAGTTTGGTTCCGATAA<br>GAAGGCAG   | CACAGCCTGAAGAAGTTG<br>TCCATCT    |   |
| <b>CL2477Contig1</b>                                 | ATTGGAGCCTGAAGATT<br>TTGCACAT   | ACCCTCCATCCAGTGGTAA<br>GTTGAC    |   |
| <b>CL1Contig1080</b>                                 | ATTGGAGCCTGAAGATT<br>TTGCACAT   | CAAAGAGTGAAGCAGAGG<br>ACTTGGTG   |   |
| <b>CL6421Contig2</b>                                 | CTCAAGTCCGGCTTTG<br>GGAGTAAG    | TCTATGAATTTGGAGCAAC<br>TGGTATTCG |   |
| <b>CL9584Contig1</b>                                 | TGAAAGGCATAGTGAA<br>TGGACCGT    | AGGATGTTCTGGTTGGAGT<br>TGGAGG    |   |
| <b>CL10060Contig1</b>                                | TTGGTGAGGAGACGGTG<br>AGGTTATT   | CTAACCTTGTCTAGGCCGA<br>TGGATG    |   |
| <b>CL1Contig2783</b>                                 | TGGATGGCAAGGTGGCA<br>CTGATAAC   | GCAAACAGAGTCGCCCAA<br>TTCGTCT    |   |
| <b>gil31073227 gb CA9<br/>93506.1 CA993506</b>       | GGGACGTAATAAGCAAC<br>GAGGAAGC   | CACCCCTTTGTGCAGGTAA<br>TTGATC    |   |
| <b>CL8845Contig2</b>                                 | AAAGGGTAGAGATGTTT<br>GAGATTGAGC | TGTAAAGCATGGATTCTTG<br>GATTGC    |   |
| <b>CL15011Contig1</b>                                | ACAAGGCGGAAAGCATC<br>TTCAAAC    | CCATTACGAGCTTCGAGG<br>AGGTTTT    |   |
| <b>gil109841587 gb D<br/>W240147.1 DW240<br/>147</b> | GCCTCAAAAAGGAAGA<br>CCTCAAAC    | GCGAAAGGATAGGATCAC<br>CGCAAAA    |   |
| <b>CL3422Contig1</b>                                 | ACCCTTCGACAACCTGG<br>TTCTCTG    | ATCCGATCCAGCCAATGAA<br>ACACTC    |   |
| <b>CL3601Contig2</b>                                 | AGCAGCAATAAATCCAA<br>GTCCAGTG   | CTCATCTGACGCATAGTTC<br>TCACCG    |   |
| <b>CL7Contig20</b>                                   | AGCTAGAGCCGAGCACA<br>TTAAGCAG   | CTATTACCACAGTTGGCAG<br>ACTACACCC |   |
| <b>CL850Contig5</b>                                  | TCCATCACCGCATCCACC<br>ACAATG    | TTCTTCCCTCCGCAACCG<br>TTCAGC     |   |
| <b>CL8888Contig1</b>                                 | GAGAAACCAACTCCGTG<br>TCCCAAAC   | CGACTGCTGCACAGACTC<br>CACTT      |   |
| <b>CL12490Contig1</b>                                | AAGGTTGCTTCGGATTC<br>ATCGGCTC   | CCCATCGGATTTCTCATCG<br>TCTTCG    |   |
| <b>CL272Contig1</b>                                  | GAAGGCTGCTAAGGCTG<br>TAAAATCG   | AAGTCCTTGGCCGATGAA<br>AGGTAAC    |   |
| <b>CL335Contig1</b>                                  | GTTTCGGATTACTTGTTA<br>CAGGAGACC | ATTCCATTCATTTCTGTTCAT<br>GGCTC   |   |
| <b>CL6627Contig2</b>                                 | GGTTTCAACATGGGCTT               | CAGCCATTAGATTCTTTGA              |   |

|                       |                                   |                                 |   |
|-----------------------|-----------------------------------|---------------------------------|---|
|                       | GTTTGTAG                          | GGGTTG                          |   |
| <b>CL8648Contig1</b>  | CAACCCTTCCTATCATCG<br>TTTACCAG    | GACTGTCCTTTACCACCAT<br>CATCACC  |   |
| <b>CL9351Contig1</b>  | GCTGAGGAGGCATTACA<br>GAAGTTGA     | CAAAGCATAGCCGTAACCA<br>TCGTAG   | F |
| <b>CL1Contig474</b>   | GCACGAGAAAACACAA<br>ACGTAGAAC     | ACCGAACTTATCGAGTCCT<br>GTCTTG   | F |
| <b>CL18473Contig1</b> | CGTTGCTTTCGCCTGGCT<br>CTAT        | TGTCCTTACATTTGAAACG<br>CCCAGT   |   |
| <b>CL1288Contig1</b>  | GAAGATGTGGACATGGC<br>TATTCGTG     | CTTCAAAGCGCACTGCATT<br>ATTCAC   |   |
| <b>CL1014Contig3</b>  | ATCATTTAACCCCTCCGAA<br>GACCTGTACT | GGAGCTTGATTACTACCAG<br>CCTGAGC  |   |
| <b>CL18395Contig1</b> | TGAGTCGGATCATATAACC<br>AGTCCACAC  | TCTAAGGTCGTCCAAATTG<br>TCAACG   |   |
| <b>CL2983Contig1</b>  | GCAACATGATAGGTGAG<br>CGAGGCAG     | GCCATGTGTCCTCTTCCAC<br>CACAGT   |   |
| <b>CL5234Contig1</b>  | AATGCCCTTCAAGTTC<br>AGAACCAG      | TGAACCGAGCATGACCAG<br>TTCTAGG   |   |
| <b>CL7303Contig1</b>  | GAGTCTAAGGTTGTGCC<br>AGTGGTGTCT   | CCCTTGCTCAAGTTGTCTT<br>CCTCATC  | F |
| <b>CL9861Contig1</b>  | AAGTTGTTGGAGGAAGT<br>GTTGTCCG     | GGCAGTCTTTCATAAGTTG<br>CGTTGG   |   |
| <b>gil84156557</b>    | CGTTGGTGTATTACCGTG<br>GAAGTGC     | TCAGCATCTTGTGCAGTCA<br>ATGTGG   | F |
| <b>CL11984Contig1</b> | GACGGTGTCAGGGTATT<br>GGAAGGCT     | CCCTTTGGTGGCTTGCCCT<br>TGT      |   |
| <b>CL1234Contig1</b>  | GTGGGATTTGCCTCATTT<br>GTCTGCT     | AATAACCCGCCTCGGTAGC<br>CCTATT   |   |
| <b>CL14720Contig1</b> | CGTTGGTGTATTACCGTG<br>GAAGTGC     | CTTCAGCATCTTGTGCAGT<br>CAATGTG  |   |
| <b>CL1544Contig2</b>  | TTGTTCCAAATCACCTG<br>GCAAGTCC     | CCTGGGTTCCGCTTCCATC<br>CTAC     |   |
| <b>CL1776Contig2</b>  | TATGTCAGCACAATGCC<br>GCCTACAC     | TTATCAGCTCGCTGAGTTC<br>TGAGTCCA | F |
| <b>CL19642Contig1</b> | CAGAGTTCGGTGAAAAT<br>GAATGGTAT    | TTTATCCGTACCAGTAGCC<br>TTCCAG   | F |
| <b>CL1Contig3933</b>  | CAAAGCGAGCCGCAATG<br>GAAGGACT     | GGGCAGGAAACCCGTTAT<br>CAACAGTGG |   |
| <b>CL23294Contig1</b> | AATAATGACACGGATGA<br>CCACGAAG     | GCTCCATGTCCCCTTTTT<br>AACCTC    |   |
| <b>CL362Contig5</b>   | GGGAATTTAGATTGGGC<br>GAGTCTTGC    | GGTTAGCGTAGGCGGCATC<br>GTG      |   |
| <b>CL4334Contig2</b>  | AAACAATGGGGCTAAGC<br>AAGACAAG     | CAGAAGCAGGACCCGTAG<br>GTATGATT  |   |
| <b>CL5075Contig1</b>  | CCGATAGAAGACCGTAA                 | TGATTTGGTTGGTGGTGTA             |   |

|                                            |                                   |                                    |   |
|--------------------------------------------|-----------------------------------|------------------------------------|---|
|                                            | AGCAGTGG                          | GGAAGC                             |   |
| <b>CL7259Contig1</b>                       | AAGATATGCACCTTGTTA<br>TCCCAGTCC   | TAAAGTAAAACCATGCTC<br>CACGTCTC     |   |
| <b>CL8550Contig2</b>                       | ATGATGAGAAAGAAGGA<br>TTGGCTGTT    | TTGAATTACCGGAACTCGA<br>AGAAGAT     |   |
| <b>CL921Contig2</b>                        | ACCAACTGGATTATGCA<br>CGAGTATCG    | CGACATAACACCCAATCAT<br>CAAGCC      |   |
| <b>CL21669Contig1</b>                      | ATCTCCTCTTCGCCGTTT<br>CTCCTCC     | TCGGAACCGATTGACCAA<br>ACTCCTG      |   |
| <b>CL3434Contig1</b>                       | AGAGCTTTGGCTGTAGC<br>GGCTAAAG     | CTCCTTCCTAAACTTCAGC<br>TTAACACGG   |   |
| <b>CL8229Contig1</b>                       | GCTTTAGGTGCCTGGTG<br>ATTGTTAC     | GCGATTCCATACAAGTGTTG<br>GAACAG     | F |
| <b>CL8292Contig1</b>                       | AGAGGGCAGAACAAGC<br>ACGGACAGT     | CATTTGGGAACCATCCTCT<br>TCTAATCTTTG |   |
| <b>CL247Contig6</b>                        | ATGAACCATTGAATGAA<br>GATGACGAT    | CATCGGCTCTTTGTACGTG<br>TTACCT      |   |
| <b>CL14551Contig1</b>                      | CGTCGTTTTCGTGCTTCT<br>AACTTTC     | AACTGAATTTGATTCCAAC<br>CCTCATC     |   |
| <b>CL10910Contig1</b>                      | CAAAGACATAAGGCGTT<br>ATTACTGCG    | CGTCCGTATGATGAGTGAG<br>AATGTG      |   |
| <b>CL1Contig2526</b>                       | TGTGATCTCTAATATTCC<br>CCGTGTCTG   | CTTAAGACATAAAGGTCTCG<br>TGAGCTGC   |   |
| <b>CL265Contig2</b>                        | TCAAACTAAAAGCTGG<br>CCGAAGT       | GCGTACCCTCTTGGGACAT<br>TTCTCT      |   |
| <b>CL265Contig9</b>                        | GGTTGAGCAACTAGACC<br>CTGAGAACTC   | TCCTCTCTTTCACAGTCC<br>GACGAT       |   |
| <b>CL6137Contig1</b>                       | CCTGCTGAGGATTGGAC<br>TAGGACAT     | TTCTAAGCGTACCCTCTTG<br>GGACCT      |   |
| <b>CL318Contig1</b>                        | TGCACTACTCAGCTCAG<br>AAGAGGAGG    | AAACCGCTACCAGAGGAT<br>TTCAGAGT     |   |
| <b>CL3537Contig1</b>                       | AGGTTCCCTCCCTTATGTG<br>TCACTACTGT | TCGGGTAAGAGTGACATG<br>CGGATT       |   |
| <b>CL2712Contig1</b>                       | ATCGGATGCGCGTTGTTT<br>ACAGTCT     | CCATACCAGAATCGAACG<br>GTCACAC      |   |
| <b>CL4089Contig1</b>                       | GAAAAAAGCGGTATGAA<br>GGTTGGAT     | CGTAGCTGGTGTGCTTGA<br>AGAGTT       | F |
| <b>gil164246440 gb ES851920.1 ES851920</b> | CTGGGTTATCTTTGTTTT<br>CAGGAAATG   | CTATTTTGCCAATTTGTCTT<br>TTCACC     |   |
| <b>gil164247134 gb ES810196.1 ES810196</b> | TGGATGAGATGAGGAAG<br>AAATCAAG     | AAAGAAGAAGATAAAACT<br>GCAAGCC      |   |
| <b>CL1Contig1522</b>                       | ATTGGAACCTCCCTTTTTT<br>GGATTGC    | CTTGTGGCTCGTAGCTTCT<br>CTGGCT      |   |
| <b>CL19841Contig1</b>                      | GATTTTCATTGGTAGGCAG<br>AACCGCT    | TCACACGATGGTACTCCAG<br>ATATGC      |   |
| <b>CL16532Contig1</b>                      | TAGTTCTCTTTGGTACGA                | GTTTTTCTCCTTTGCTGGA                |   |

---

|                                            |                                |                                 |
|--------------------------------------------|--------------------------------|---------------------------------|
|                                            | AATTGGC                        | TTTGTC                          |
| <b>CL14456Contig1</b>                      | AGAAGAATTTGCAGCTT<br>CTTCCGGT  | CGAACTCGAAGAAGTGTT<br>GCCGAA    |
| <b>CL1Contig1522</b>                       | ATTGGAACCTCCCTTTTTT<br>GGATTGC | CTTGTGGCTCGTAGCTTCT<br>CTGGCT   |
| <b>CL714Contig5</b>                        | CGGGTTTGGGAGATCTA<br>GGAAAAAG  | CGCCGCGATGACAACTAC<br>AAGAG     |
| <b>CL4420Contig1</b>                       | AAAAACCGAAATTTTAC<br>CAAACACC  | CCAAGAATCAAACCACAA<br>GCAGCAG   |
| <b>CL2463Contig3</b>                       | AACCATGTGCAAAGTGC<br>TGAACAAC  | AGGCAACCCAAGAAAAGT<br>GAAAGAC   |
| <b>CL1Contig2677</b>                       | CCGTGGACCATGAATAT<br>GTTTTCTC  | TTTGGAAAGATTGAAGTGCT<br>AGCGTT  |
| <b>CL1Contig4241</b>                       | GGAGCACAGTGAAGAA<br>CACCGTGAG  | CAGCTTTTGCATCAACGGG<br>TAGGTA   |
| <b>CL18193Contig1</b>                      | GAGCATGGATGAGGTTT<br>ATGGATTG  | CAGAGGAGGCTTCTTAGG<br>TGTGGAG   |
| <b>CL9434Contig1</b>                       | TAAACTAAATGATACGCC<br>CCGGCT   | AACATTATTCAAGTTTCTT<br>CTCCCCTT |
| <b>CL4874Contig2</b>                       | TCTCTCTTTCCTCCATCA<br>ACCTGGG  | CCTCCATTCTTGGTTCCCC<br>AAAAGT   |
| <b>CL932Contig2</b>                        | CGATTGCTCCGATTGTGC<br>CGCCTAT  | TCATCCCGTACCCCTGCC<br>GAAGT     |
| <b>CL932Contig1</b>                        | CAAACCTCGGGCAGGGGT<br>ACGGTAT  | GGGAAGAACCAGTGTCCG<br>GATCAAC   |
| <b>CL23Contig4</b>                         | GGCCATCCCTCTACTAGT<br>CCCACAC  | CCTTCGATTCCCTCCTCGAA<br>AAACCT  |
| <b>CL23Contig5</b>                         | GCGTTGTGTGTGTTGTG<br>TTGTGTGT  | AAGAGTGGAAATGGAGTGG<br>TGGAGTC  |
| <b>CL1Contig4168</b>                       | CGGAGCTGGTGAACCAC<br>CCTGAAAT  | GCCTGAAGGTAGGGGAGT<br>TTGTGGG   |
| <b>CL1Contig487</b>                        | CACTTGGATGATCTCTGC<br>ATGTCTC  | GGGTATTTTTCTCTTAGCAT<br>TTTGGC  |
| <b>CL1Contig951</b>                        | CTTAAGCCTGGGCAACG<br>TCTACAGC  | TCAGCAAACCCGATAAAC<br>AAAACCG   |
| <b>CL4592Contig1</b>                       | TGAGGGTACCATAATCA<br>AGACACCC  | GAGAGCAGCAAAGTCATA<br>GAGCAGC   |
| <b>gil164263375 gb ES818411.1 ES818411</b> | GGTCAAAGAGGAGATCC<br>TGGAGAAG  | GTTCCCTATTTGCAGAAGGG<br>AGAGTG  |
| <b>gil84155298 gb DN804653.1 DN804653</b>  | TGGGATGTTGACAAATG<br>GATACAAG  | CTAATAGAATGCGTCTATT<br>GTCGCTC  |
| <b>CL12975Contig1</b>                      | GCTTCTACATGACTCGG<br>AGCAAACC  | CAGGATTGCACTGGTAATG<br>AACTTGG  |
| <b>CL1Contig3117</b>                       | CAAAGCATCCACAGATT<br>AGGGGCAT  | TCAAGCATCTATCATCGCC<br>CCAATC   |
| <b>CL9890Contig2</b>                       | TACGAACAAAGGCAAAG              | TGACAGATTGAACAGCAT              |

---

|                                            |                               |                                |
|--------------------------------------------|-------------------------------|--------------------------------|
|                                            | AAAGGACC                      | GAATGGG                        |
| <b>CL3178Contig2</b>                       | AAAAGAGAGGCGGGAA<br>GAAGAATGG | ATGCTCTCAGGGGTAAAC<br>CTCAATG  |
| <b>gil164343485 gb ES810478.1 ES810478</b> | TAAGAGGTTCTTGCCGT<br>CGGAGTTT | AATGATCCAAGGGTGGAA<br>TGACCTC  |
| <b>CL1Contig4329</b>                       | TTCTTCTACATTGTTCG<br>AGCCAGG  | GAGTCTTGTTGCTGTCT<br>GGGGTC    |
| <b>CL178Contig3</b>                        | GAGGTTTGTACCGTCGG<br>AATTTGGT | CAAGGGGTGGTAGAACAT<br>CTGCTGG  |
| <b>CL1Contig29</b>                         | ATTGCTGGTTGTGACCTT<br>GTCTTCC | CTCGTTTAACTGTTTTTGC<br>TTTGGC  |
| <b>gil164269430 gb ES833056.1 ES833056</b> | AAGTCCCTACCGATTTTG<br>GAGATT  | CCCTTAGACCTCAAATATT<br>CCACGG  |
| <b>gil164322571 gb EX172320.1 EX172320</b> | GCTGCTCAAGTGAAGCG<br>CTCTGAC  | AAATGCATGCTTCATTGAA<br>GGACAT  |
| <b>CL13889Contig1</b>                      | GGTCCGAAGTCTCAAC<br>TCCCTCTC  | ACCGAAGAACCTGGTACT<br>CACATCG  |
| <b>CL12709Contig1</b>                      | GAAGTTAAACAAGAATA<br>CGCCAACG | TCCTCAAATGAACAGGCA<br>AATAATG  |
| <b>CL8953Contig1</b>                       | AAATGGGTTCTTATCAAT<br>CCCCTTC | CTTTGTTGTTACCACAGC<br>TCTGTG   |
| <b>CL22885Contig1</b>                      | AGTCATATCGTCCTTGAG<br>TTGTGCG | CTGTTGTTGTTGGGTTCTT<br>CTTCGT  |
| <b>CL1Contig2504</b>                       | GGGAGCCTGAACCCATG<br>AAAGAGCT | GCCGTGGCTAAAAGAGAG<br>TAGCCAG  |
| <b>gil84151785 gb DN801140.1 DN801140</b>  | TAAGCCCACTCAAAGGG<br>AACAAAGC | TGCGCAACTGATCCATAACC<br>ATAACG |
| <b>CL546Contig1</b>                        | ACAACCTCCAATCGCTT<br>GCTTCCG  | GCTAACGCCCATGCTGTCT<br>TCTCTG  |
| <b>CL823Contig4</b>                        | ATCTCTATTGGCATCCAT<br>TTGGAGG | CAGGGCAGACAGTAACCA<br>GGTTTAC  |
| <b>CL732Contig2</b>                        | TCCAGTCATGTGGTGCTT<br>GTATGG  | GTAGTTTGAAGGGTTCGG<br>AGGGTTC  |
| <b>CL1935Contig2</b>                       | GGAGAAAATGGTGAACG<br>ATGTGATG | CCAAATTGTTAGAAGAAG<br>ACCCACC  |
| <b>CL1Contig603</b>                        | TGCTAAACGACCGCAAC<br>AAGCCAAT | TTTTCTCCGATCTCCACCG<br>ACAAC   |
| <b>CL6372Contig1</b>                       | ACCTGCCCACTTTTCTTC<br>GGTTTCC | CACGCCTTTTGCTTCCTTT<br>CCTTCC  |
| <b>CL11902Contig1</b>                      | AGCAAGGAGTGGTGAA<br>GGGATAAGC | GGAGTTGGAGAGGAAGAC<br>AGTGGTA  |
| <b>CL17341Contig1</b>                      | AAGGGGTTGCTTGAAAC<br>TGGGGGTC | TGGGGGGGAAAAAATTG<br>CACTTGT   |
| <b>CL1278Contig1</b>                       | GACAGGCCAATTGAGCT<br>TCCTTCTT | GCTTGGTTGATTTTATCTG<br>GCTTGA  |
| <b>CL1102Contig1</b>                       | TTGTCTCTCCTCAAGTCT            | TTCATTGGCGTATTGGATA            |



---

|                      |                    |                     |   |
|----------------------|--------------------|---------------------|---|
|                      | GCTGGTG            | GGGATT              |   |
| <b>CL451Contig3</b>  | CCCCTCTTCAGTTTGTTT | ATCGTTCTTCTCCAGCCTC |   |
|                      | CCCCTAT            | TCCATT              |   |
| <b>DQ116441</b>      | GTCAACTCTCCACCTCG  | CTGGGGGGATGCCTTCCTT |   |
|                      | TCTCCGT            | GTCTT               |   |
| <b>CL5659Contig1</b> | GAAATAGTGGCGTGGA   | ACCATGAGAGACTGAGTT  | F |
|                      | GTTAGGAT           | GTGTGAGG            |   |

---

**Table S2 List of primers used for RT-PCR.**

|                  | <b>Gene ID</b>                              | <b>Forward primer</b>         | <b>Reverse primer</b>         |
|------------------|---------------------------------------------|-------------------------------|-------------------------------|
| <b>CHS-1</b>     | gil164247134 gbl<br>ES810196.1 ES81<br>0196 | TGAGATGAGGAAGAAAT<br>CAAGGGAA | ACTCCTTTCTTATAGGGGC<br>GGAAGT |
| <b>CHS-4</b>     | CL1Contig1522                               | AAGGTGCTCGTGTACTTG<br>TTGTGTG | CGTAGCTTCTCTGGCTTC<br>AGTGCTA |
| <b>CHS-5</b>     | CL14456Contig1                              | GTGTGCCTGAAGCAATG<br>CATTACCT | GTCATTTGCCCCACAATG<br>TGTCCTA |
| <b>CHS-6</b>     | CL16532Contig1                              | AGGAGAACCTTCAGTTC<br>CAGCGTAG | TTGTTAGAGAGCAGTATT<br>GCAGCCC |
| <b>PAL-2</b>     | CL2463Contig3                               | CAAAAGAGGGTTTGGCT<br>ATGGTTAA | CAATCAAGGGATTGTCGT<br>TCACTGA |
| <b>PAL-3</b>     | CL1Contig2677                               | TATGTCCTCCACATACTT<br>GGTGGCG | GCATTCCGTGATCTTGTTT<br>GGGATT |
| <b>PAL-1</b>     | CL1Contig4241                               | CAATGGACAATGCTCGTT<br>TGGCTAT | CACGGTGTCTTCACTGT<br>GCTCCTC  |
| <b>4CL-1</b>     | CL18193Contig1                              | CGTAAATACCTGGAGCAT<br>AGGGAGA | CGGAAAGTTGAATTCTAT<br>CAGAGGA |
| <b>4CL-2</b>     | CL9434Contig1                               | CAGTGCTGCTTTACTCTT<br>CGGGGAC | CACTCCTCCATCAACTCTT<br>TTCCCA |
| <b>4CL-3</b>     | CL4874Contig2                               | GAGAGGTTCCAGTTGCT<br>TTCGTTGT | TGGTTTTTTTTTCGAGTT<br>TGTTTAC |
| <b>4CL-4</b>     | CL932Contig2                                | ACGGCTGCCAATCCTTTT<br>TTCACT  | TTCAGGGCGTAAATATGG<br>AACATGG |
| <b>4CL-5</b>     | CL932Contig1                                | AATTGTTGATCCCGACAC<br>TGGTTCT | ATTATTTCAAACCTCCAGG<br>GCAGGC |
| <b>C4H-1</b>     | CL23Contig4                                 | ATCCAGAGATCCAGCAG<br>AAACTCCG | GACAGCTCCTCCTCCAA<br>CACCAAA  |
| <b>C4H-2</b>     | CL23Contig5                                 | GGGTTGTGTGGCTGTATT<br>GTTGTGG | GGCTAAGTCTGTGAGGTT<br>GCGGTGG |
| <b>C4H-3</b>     | CL1Contig4168                               | TGGATGCTCAACAGAAG<br>GGGGAA   | GCAACTTCTTCTCCCCAC<br>GCCA    |
| <b>CCoAOMT-1</b> | CL1Contig2504                               | TAGTGGCAAATGGCAAC<br>CAACAAAA | ATCTTCCCATCATCGGGG<br>ACAGC   |
| <b>CCoAOMT-2</b> | gil84151785 gblD<br>N801140.1 DN80<br>1140  | GGGAACAAAGCTGGAGC<br>TCCACCGC | CATGATAGCACCTCATTAT<br>TAAACA |
| <b>CCR-1</b>     | CL546Contig1                                | GAGCAGCACATAATGTG<br>GTAGAGGC | CGGAGAATAAGGTGTAAG<br>CAAACGG |
| <b>CCR-2</b>     | CL823Contig4                                | TTGGATGAAAGCAAAGG<br>AGCTAAAA | TTTCAAGTTTTACAAGGC<br>AAGCGTT |
| <b>CAD-1</b>     | CL1278Contig1                               | GTAACCGTCATCAGCACT<br>TCTCCGT | TTTCTTGCGTCTCTTTCAT<br>ACCCCC |
| <b>CAD-2</b>     | CL1102Contig1                               | CGCTATAACATGAACCAA<br>CCTGGCA | GGGAACCCAACGAGGGC<br>ATAAACAC |

|                  |              |                                |                                |
|------------------|--------------|--------------------------------|--------------------------------|
| <b>CAD-3</b>     | CL451Contig3 | CGATGTTTCGATACAGATT<br>CGTCGTG | GTGGTTTTTCCAAAAGGGG<br>GAGATAT |
| <b>ubiquitin</b> | DQ116441     | ACCAAAATCCAAGATAA<br>GGAAGGCAT | ACGCAAACGAAGGACAA<br>GGTGGAG   |

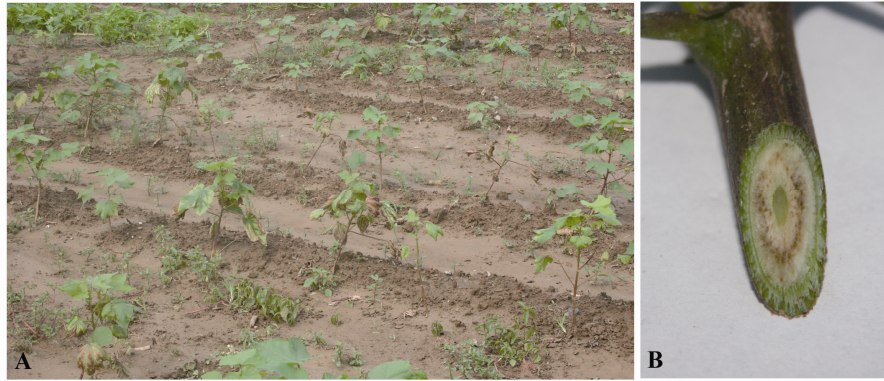

**Fig. S1.** The representative symptoms of diseased cotton seedlings in the field (A) and anatomy analysis of the diseased cotton stem (B).

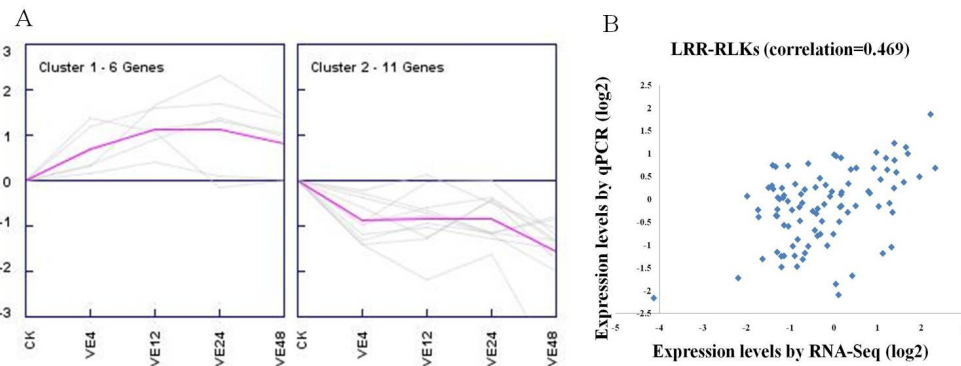

**Fig. S2.** Expression of LRR-RLKs identified by RNA-Seq (A) and validation by qPCR (B). CK refers to the mock control and VE4, VE12, VE24, and VE48 refer to 4, 12, 24, and 48 h after inoculation with *V. dahliae*.

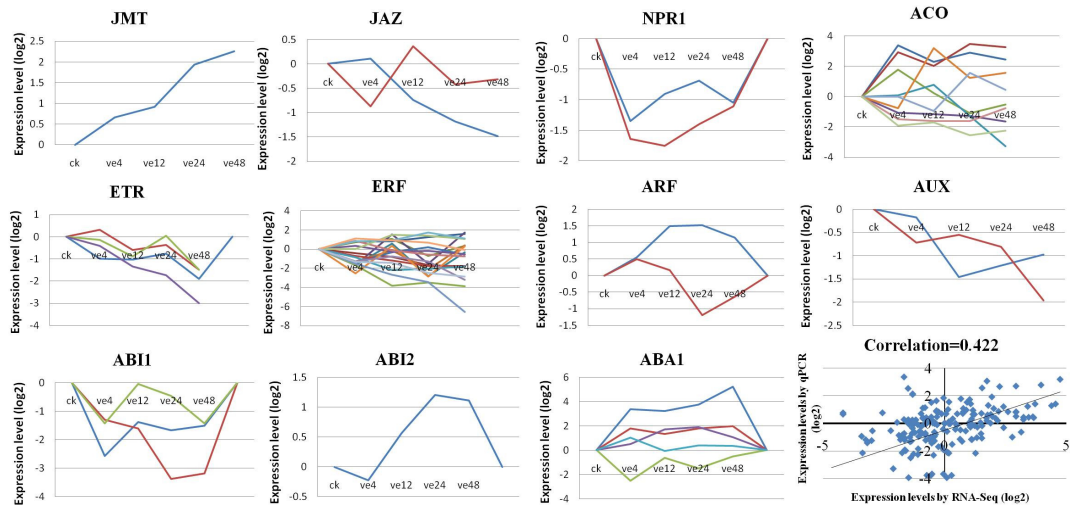

**Fig. S3.** Detailed expression patterns of defense-responsive genes identified in different phytohormone signaling pathways and data validation by qPCR. CK refers to the mock control and VE4, VE12, VE24, and VE48 refer to 4, 12, 24, and 48 h after *V. dahliae* inoculation. JAZ, jasmonate ZIM-domain; NPR1, non-expressor of pathogenesis-related protein 1; ACO, 1-aminocyclopropane-1-carboxylate oxidase; ETR, ethylene receptor; ERF, ethylene response factor; ARF, auxin response factor; ABA, ABA-deficient gene; ABI, ABA-insensitive gene.

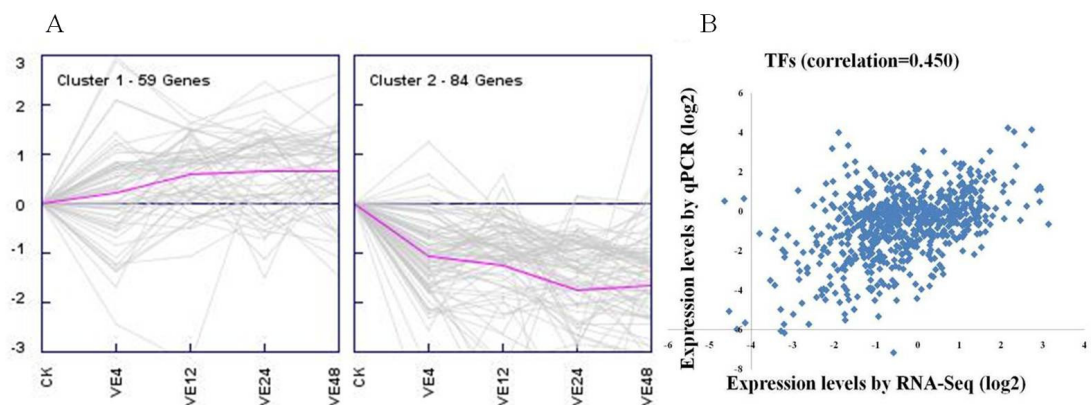

**Fig. S4.** Expression of TFs identified by RNA-Seq (A) and validation by qPCR (B). CK refers to the mock control and VE4, VE12, VE24, and VE48 refer to 4, 12, 24, and 48 h after inoculation with *V. dahliae*.

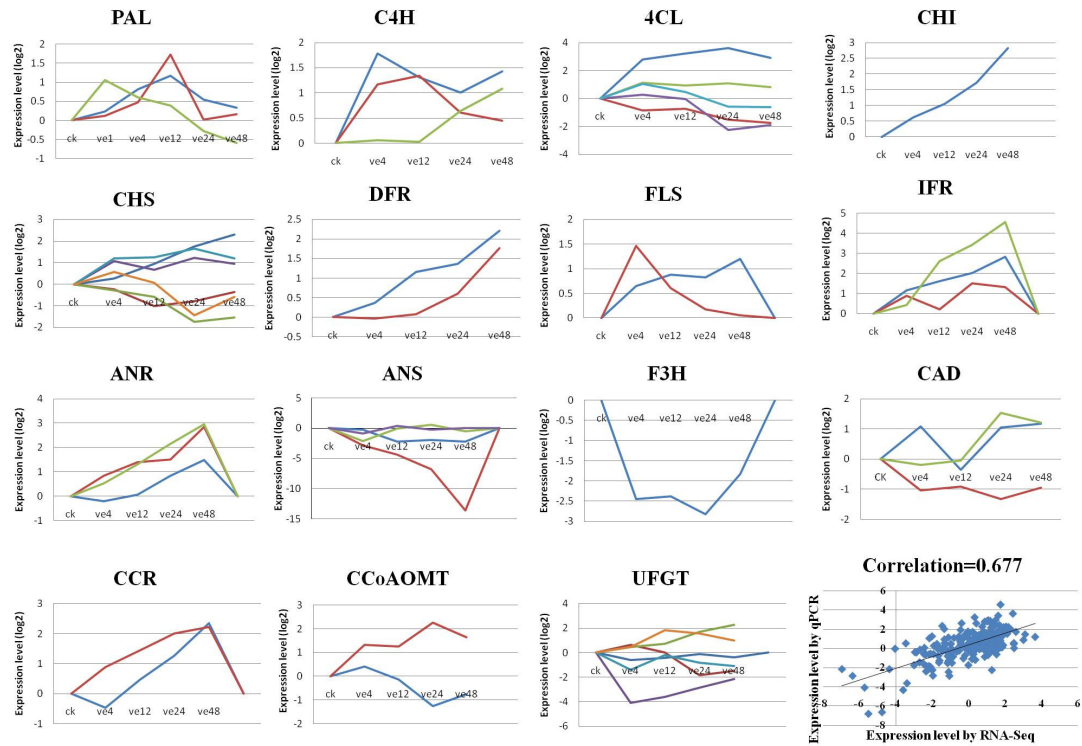

Fig. S5. Detailed expression patterns of defense-responsive genes identified in phenylpropanoid pathway and data validation by qPCR. CK refers to the mock control and VE4, VE12, VE24, and VE48 refer to 4, 12, 24, and 48 h after inoculation with *V. dahliae*. PAL, phenylalanine ammonia-lyase; C4H, cinnamate 4-hydroxylase; 4CL, 4-coumarate: CoA ligase; CHS, chalcone synthase; CHI, chalcone isomerase; IFR, isoflavone reductase; FS, flavone synthases; F3H, flavanone 3-hydroxylase; FLS, flavonol synthases; DFR, dihydroflavonol-4-reductase; ANS, anthocyanidin synthase; ANR, anthocyanidin reductase; UFGT, UDP-flavonoid glucosyltransferase; CCR, cinnamoyl CoA reductase; CCoAOMT, caffeoyl-CoA O-methyltransferase.

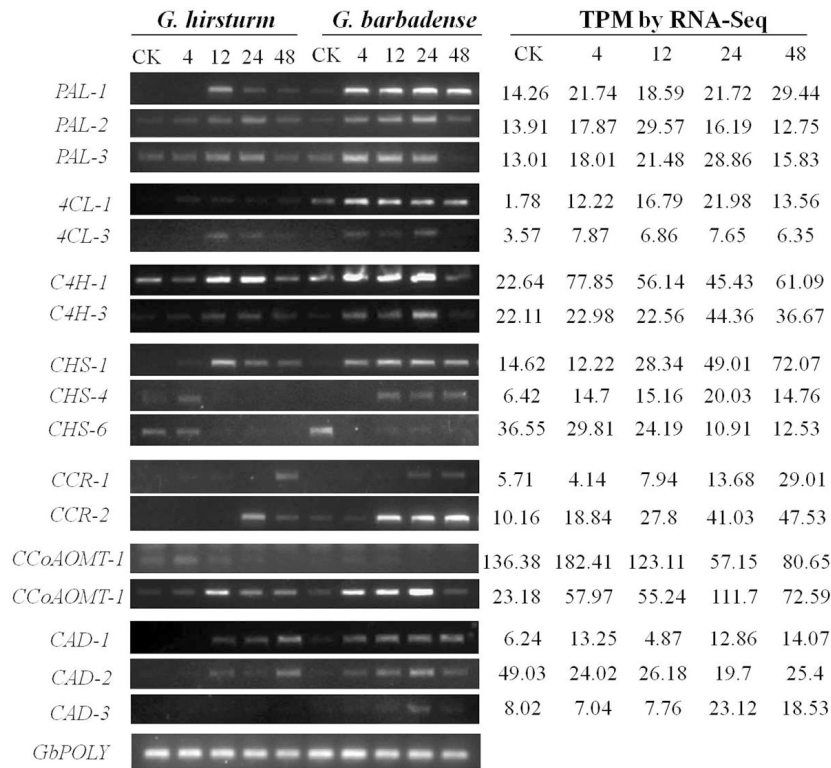

Fig. S6. Detailed expression profiles of genes in major lignin biosynthetic pathway. The absolute genes expression level were obtained by RT-PCR result and the original TPM of RNA-Seq. CK was referred to the mock control and 4, 12, 24, and 48 were referred to 4, 12, 24, and 48 h after *V. dahliae* inoculation. PAL, phenylalanine ammonia-lyase; 4CL, 4-coumarate: CoA ligase; C4H, cinnamate 4-hydroxylase; CHS, chalcone synthase; CCR, cinnamoyl CoA reductase; CCoAOMT, caffeoyl-CoA O-methyltransferase; CAD, cinnamyl alcohol dehydrogenase.
